# Supplementary material for: Kelvin probe force microscopy of the nanoscale electrical surface potential barrier of metal/semiconductor interfaces in ambient atmosphere
Source: publisher site journal article supplement (doi:10.3762/bjnano.10.138), 2019-07-15
Supplement: Additional file 1 [file 2190-4286-10-138-S1.pdf]

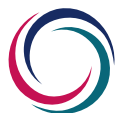

## Supporting Information

for

### **Kelvin probe force microscopy of the nanoscale electrical surface potential barrier of metal/semiconductor interfaces in ambient atmosphere**

Petr Knotek, Tomáš Plecháček, Jan Smolík, Petr Kutálek, Filip Dvořák, Milan Vlček, Jiří Navrátil and Čestmír Drašar

*Beilstein J. Nanotechnol.* **2019**, *10*, 1401–1411. [doi:10.3762/bjnano.10.138](https://doi.org/10.3762/bjnano.10.138)

### **Scheme of electric circuit**

## Schema:

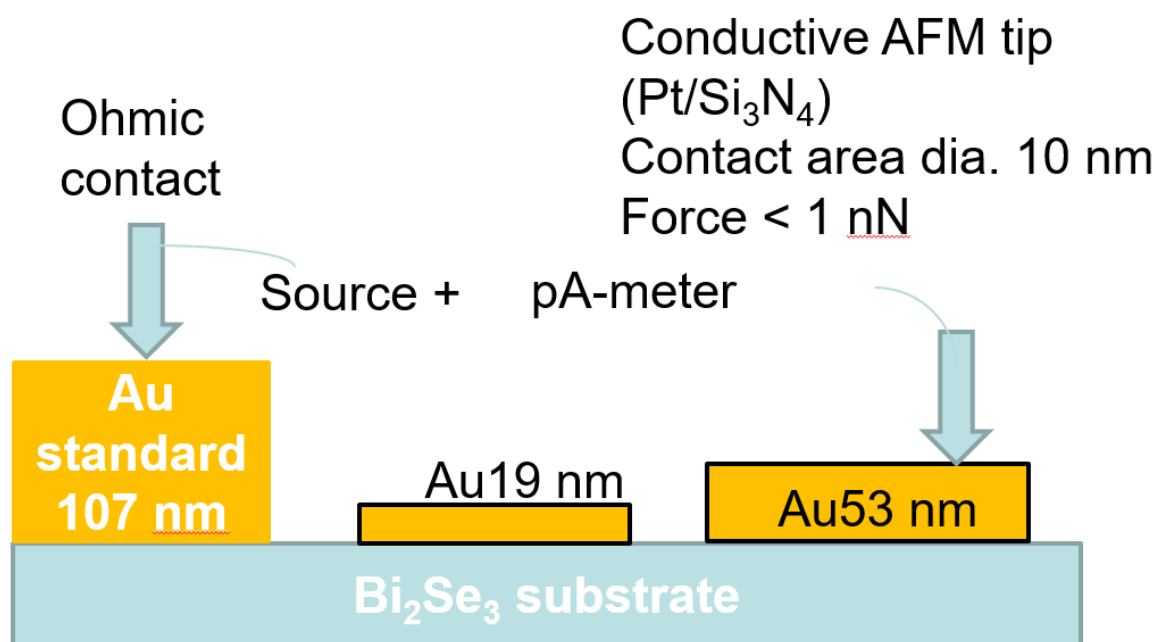

**Figure S1:** Scheme of electric circuit.
